# Supplementary material for: Verum- versus Sham-Acupuncture on Alzheimer's Disease (AD) in Animal Models: A Preclinical Systematic Review and Meta-Analysis
Source: PubMed Central journal article supplement (PMC7150729; doi:10.1155/2020/5901573), 2020-03-31

### Appendix 1. Search strategy

The following search strategy was used for PubMed, and this search strategy was also suitable for other electronic databases:

| Number | Search terms           |
|--------|------------------------|
| 1      | dementia               |
| 2      | Alzheimer disease      |
| 3      | Alzheimer's disease    |
| 4      | cognitive disorders    |
| 5      | cognitive impairment   |
| 6      | dement*                |
| 7      | Alzheimer*             |
| 8      | 1 OR 2-7               |
| 9      | acupuncture therapy    |
| 10     | acupuncture            |
| 11     | acupoints              |
| 12     | acupunct*              |
| 13     | electroacupuncture     |
| 14     | electro-acupuncture    |
| 15     | ear acupuncture        |
| 16     | auricular acupuncture  |
| 17     | scalp acupuncture      |
| 18     | body acupuncture       |
| 19     | elongated needle       |
| 20     | 9 OR 10-19             |
| 21     | Sham acupuncture       |
| 22     | Sham-acupuncture       |
| 23     | Placebo acupuncture    |
| 24     | Placebo-acupuncture    |
| 25     | 21 OR 22-24            |
| 26     | Morris water maze      |
| 27     | MWM                    |
| 28     | behavioral test        |
| 29     | 26 OR 27-28            |
| 30     | 8 AND 20 AND 25 AND 29 |

## Appendix 2. Figures of meta-regression

**Supplemental Fig.1 Univariate meta-regression based on publication year as covariate**

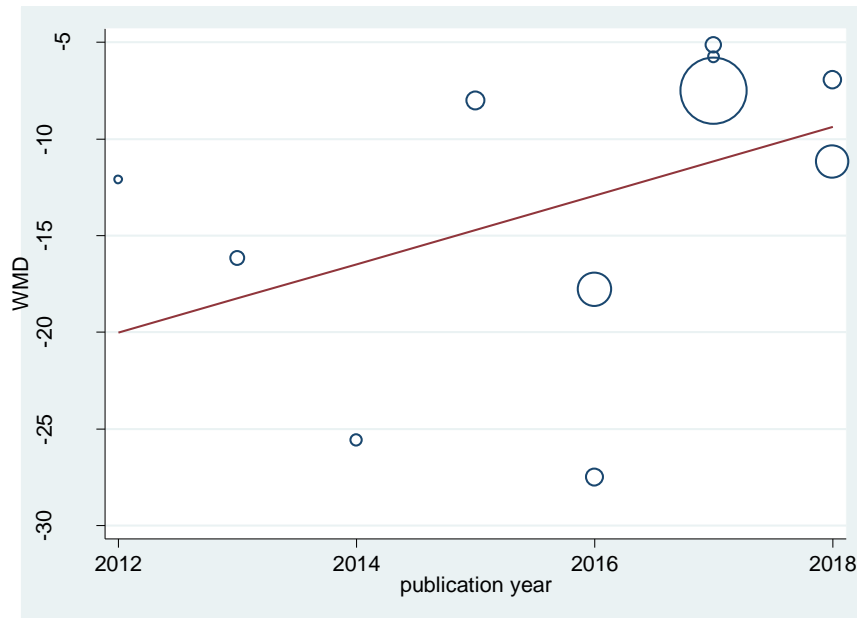

**Supplemental Fig.2 Univariate meta-regression based on study sample size as covariate**

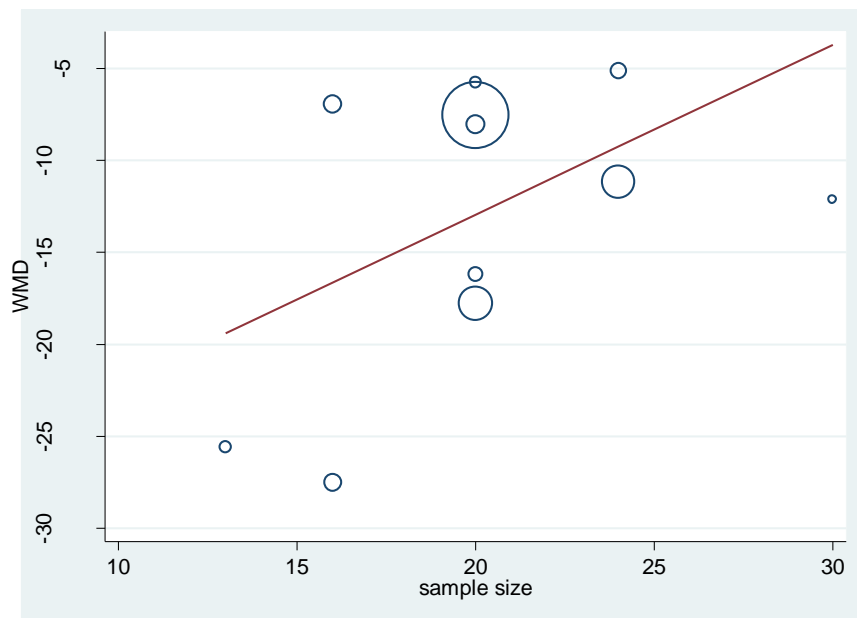

**Supplemental Fig.3 Univariate meta-regression based on animal age as covariate**

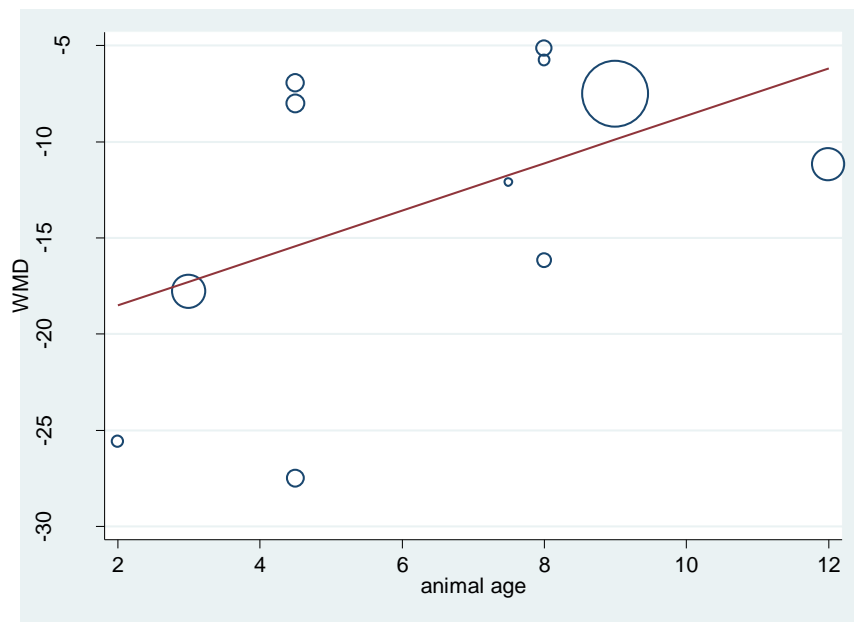

**Supplemental Fig.4 Univariate meta-regression based on animal species size as covariate**

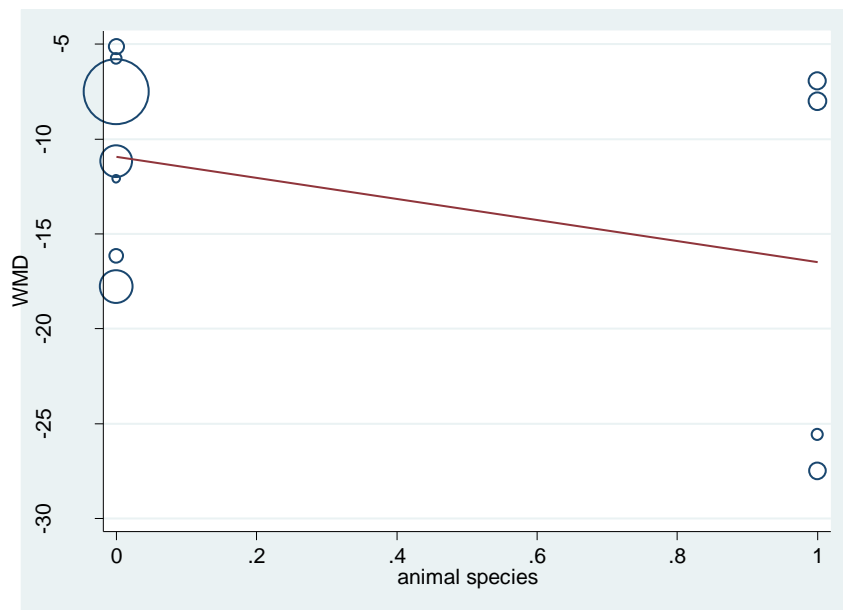

**Supplemental Fig.5 Univariate meta-regression based on acupuncture methods size as covariate**

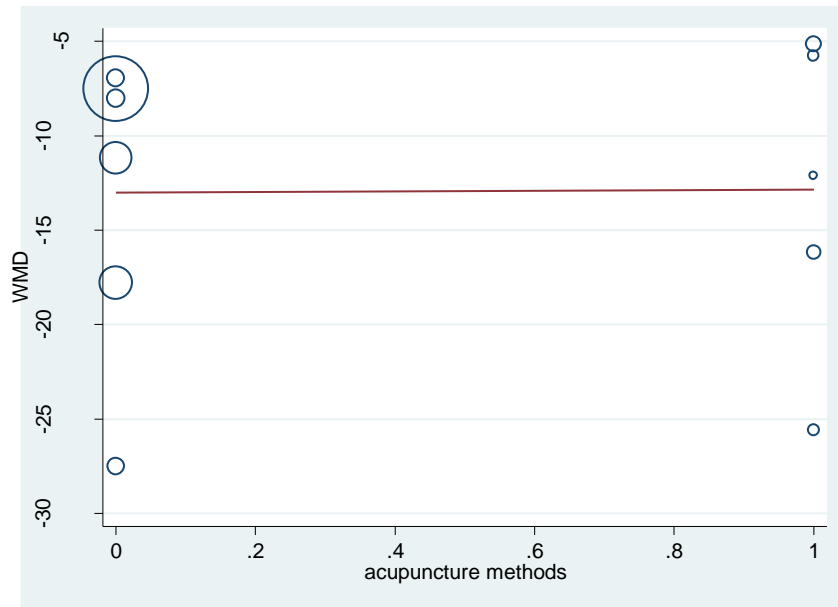

**Supplemental Fig.6 Univariate meta-regression based on acupuncture duration size as covariate**

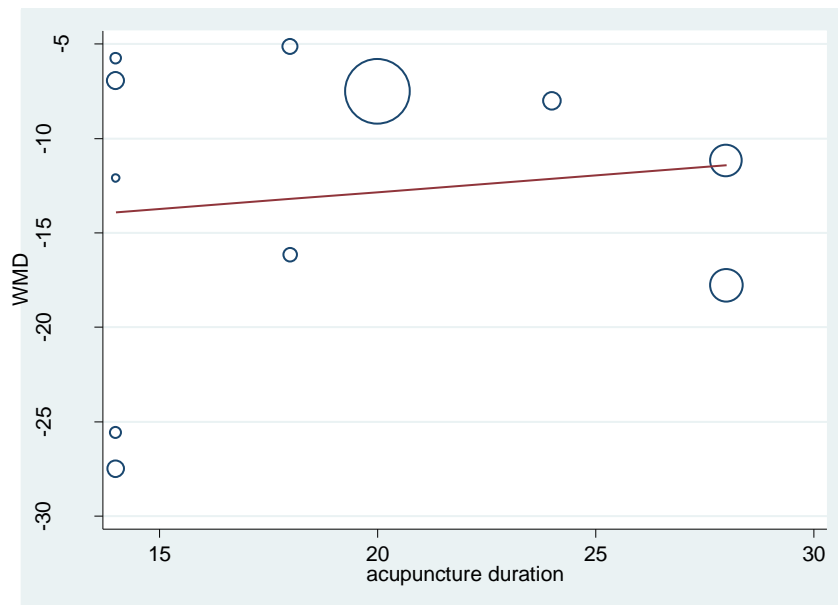

Supplement: 5901573.f1.pdf [file 5901573.f1.pdf]
